CORRECTION

# Correction: Midazolam Ameliorates the Behavior Deficits of a Rat Posttraumatic Stress Disorder Model through Dual 18 kDa Translocator Protein and Central Benzodiazepine Receptor and Neurosteroidogenesis

The *PLOS ONE* Staff

The administration method of midazolam, flumazenil, and finasteride appears incorrectly as “p.o.” throughout the article. The correct administration method is “i.p.”

## Reference

1. Miao Y-L, Guo W-Z, Shi W-Z, Fang W-W, Liu Y, Liu J, et al. (2014) Midazolam Ameliorates the Behavior Deficits of a Rat Posttraumatic Stress Disorder Model through Dual 18 kDa Translocator Protein and Central Benzodiazepine Receptor and Neurosteroidogenesis. *PLoS ONE* 9(7): e101450. doi: [10.1371/journal.pone.0101450](https://doi.org/10.1371/journal.pone.0101450) PMID: [24988461](https://pubmed.ncbi.nlm.nih.gov/24988461/)

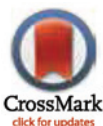

## OPEN ACCESS

**Citation:** The *PLOS ONE* Staff (2015) Correction: Midazolam Ameliorates the Behavior Deficits of a Rat Posttraumatic Stress Disorder Model through Dual 18 kDa Translocator Protein and Central Benzodiazepine Receptor and Neurosteroidogenesis. *PLoS ONE* 10(3): e0119037. doi:10.1371/journal.pone.0119037

**Published:** March 5, 2015

**Copyright:** © 2015 The PLOS ONE Staff. This is an open access article distributed under the terms of the [Creative Commons Attribution License](https://creativecommons.org/licenses/by/4.0/), which permits unrestricted use, distribution, and reproduction in any medium, provided the original author and source are credited.
